# Supplementary material for: Constructing a measurement-based spatially explicit inventory of US oil and gas methane emissions
Source: Copernicus journal article supplement (doi:10.5194/essd-2024-72), 2024-04-02
Supplement: Supplementary file 1 [file essd-2024-72-supplement.pdf]

## Supplementary Figures

**Supplementary Fig. 1.** Frequency distribution for sites below the detection limit for different production cohorts of non-low production sites

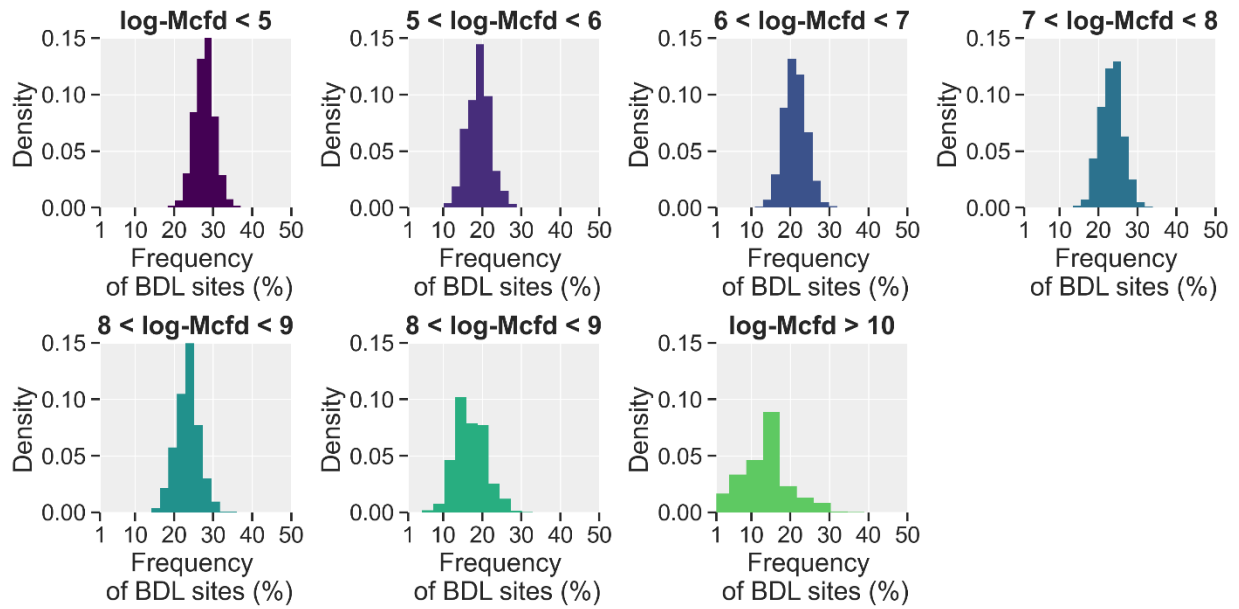

5

10

15

**Supplementary Fig. 2:** Random samples drawn from the modeled distribution for each production cohort, showing good agreement between modeled and empirical distributions.

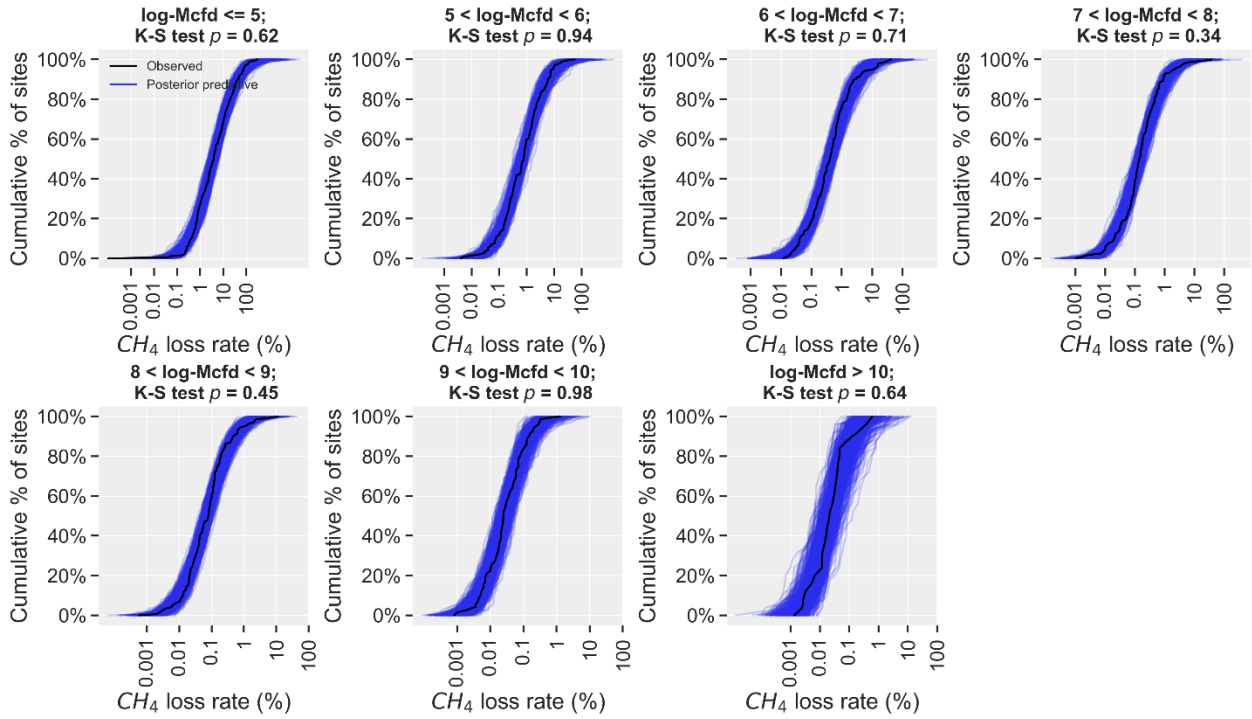

20

25

30

35 **Supplementary Fig. 3:** Comparison of facility-level gas production rates for the measured non-low production sites and the national population of well sites.

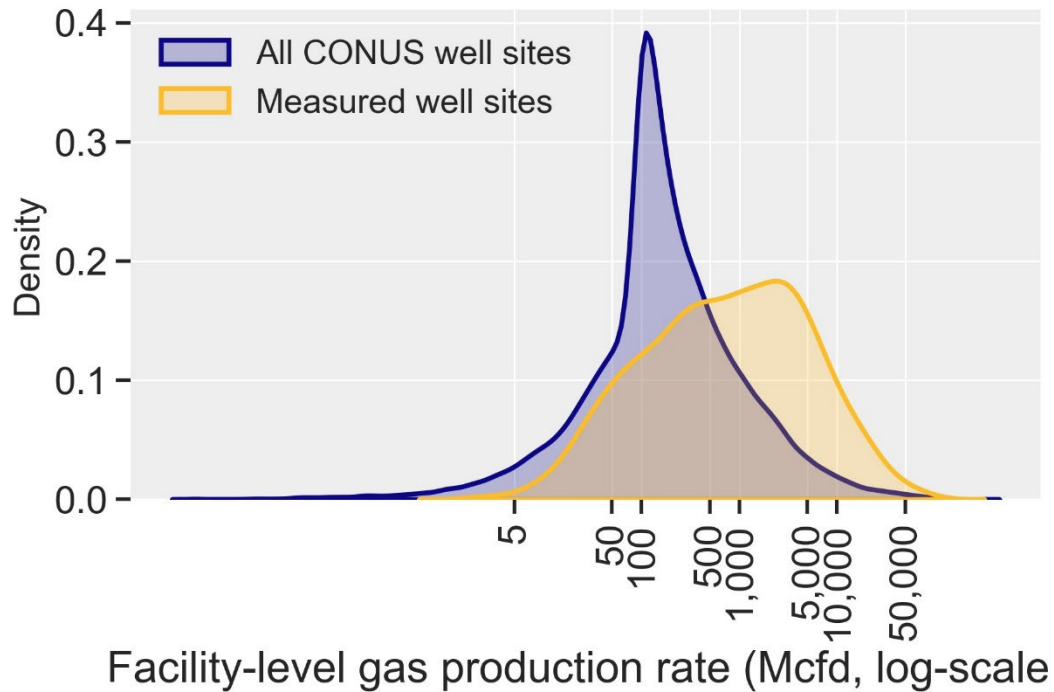

40

45

Supplementary Fig. 4. Top 6 emitting basins in EI-ME. Map credit: ESRI, 2023.

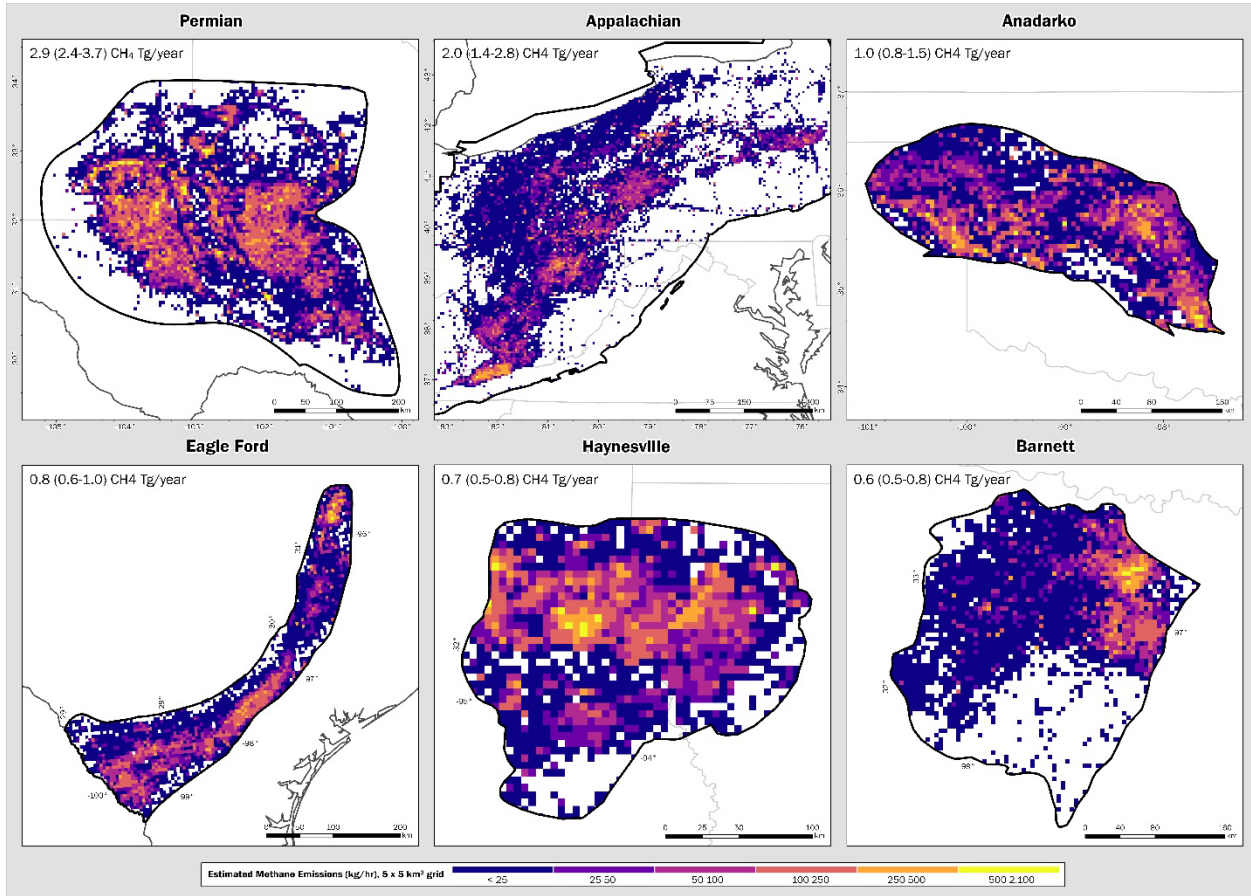

50

55

60

**Supplementary Fig. 5.** Comparison of oil and gas activity data for the top five CONUS oil and gas production basins in 2021. Map credit: ESRI, 2023.

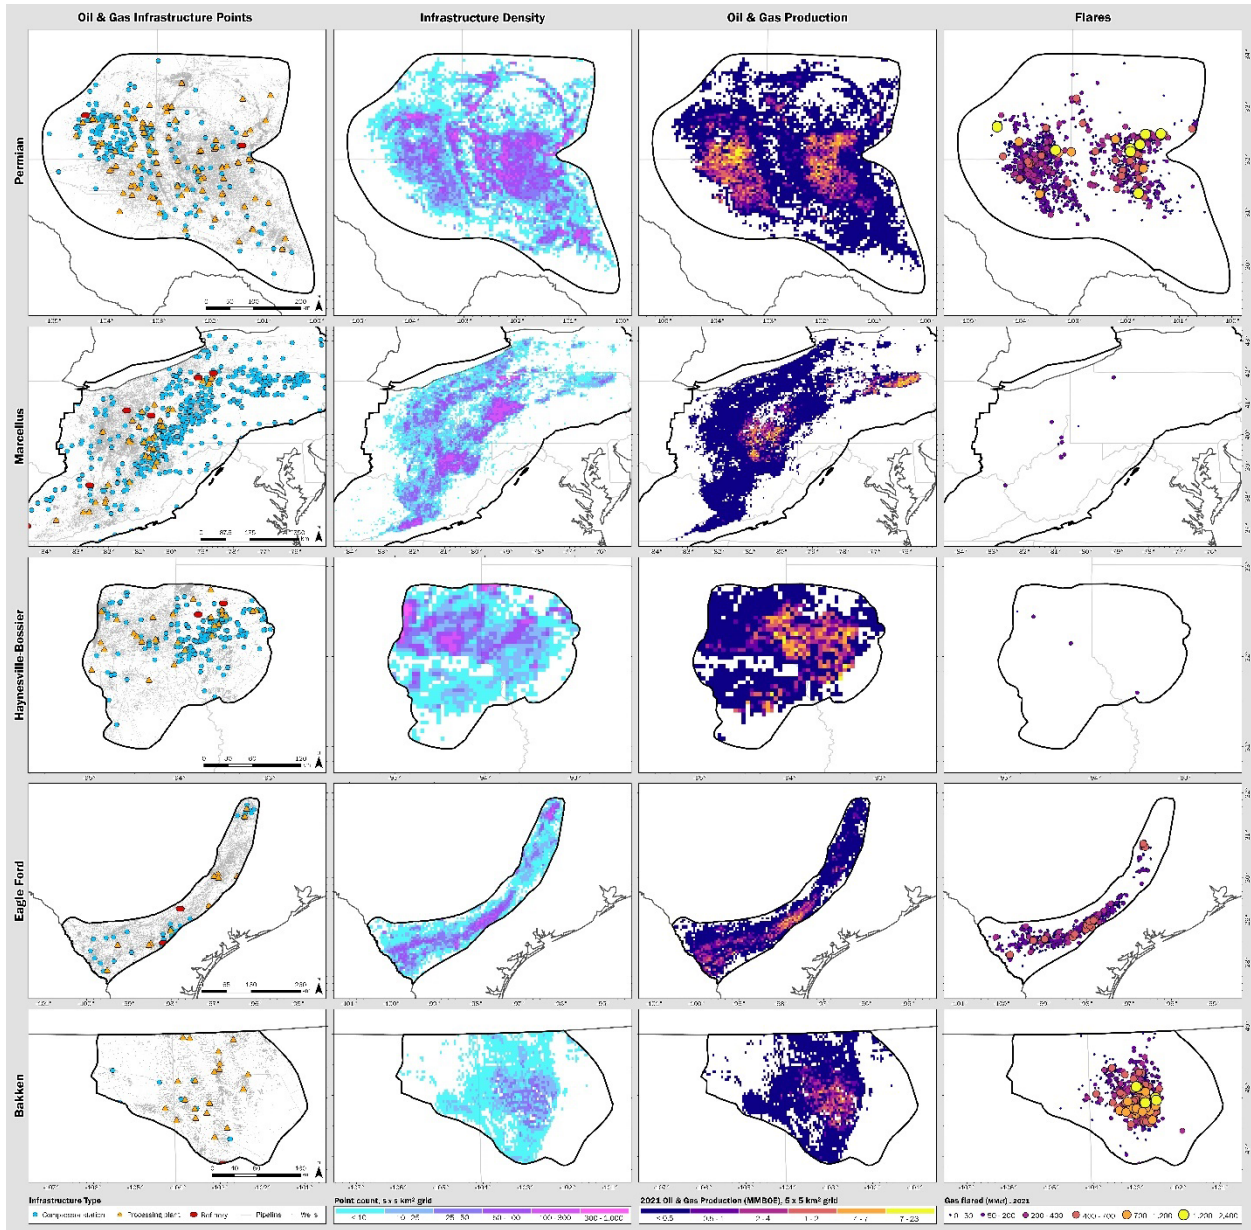

**Supplementary Fig. 6.** Spatial distribution comparison of top 3 emitting basins in EI-ME and EPA GHGI estimates. Map credit: ESRI, 2023.

70

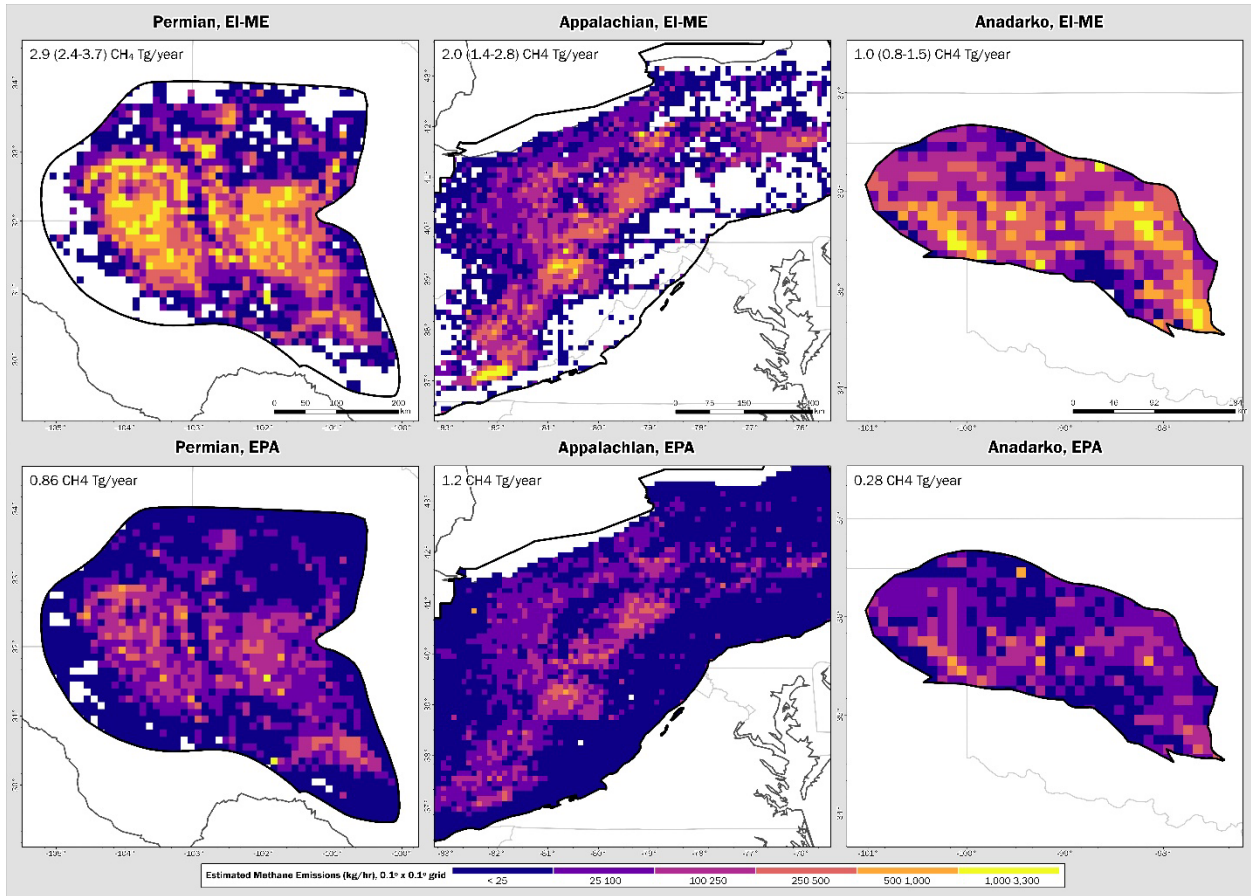

75

80

**Supplementary Fig. 7.** Difference in estimated spatial distribution of methane emissions between this study and the EDGAR v8 inventory.

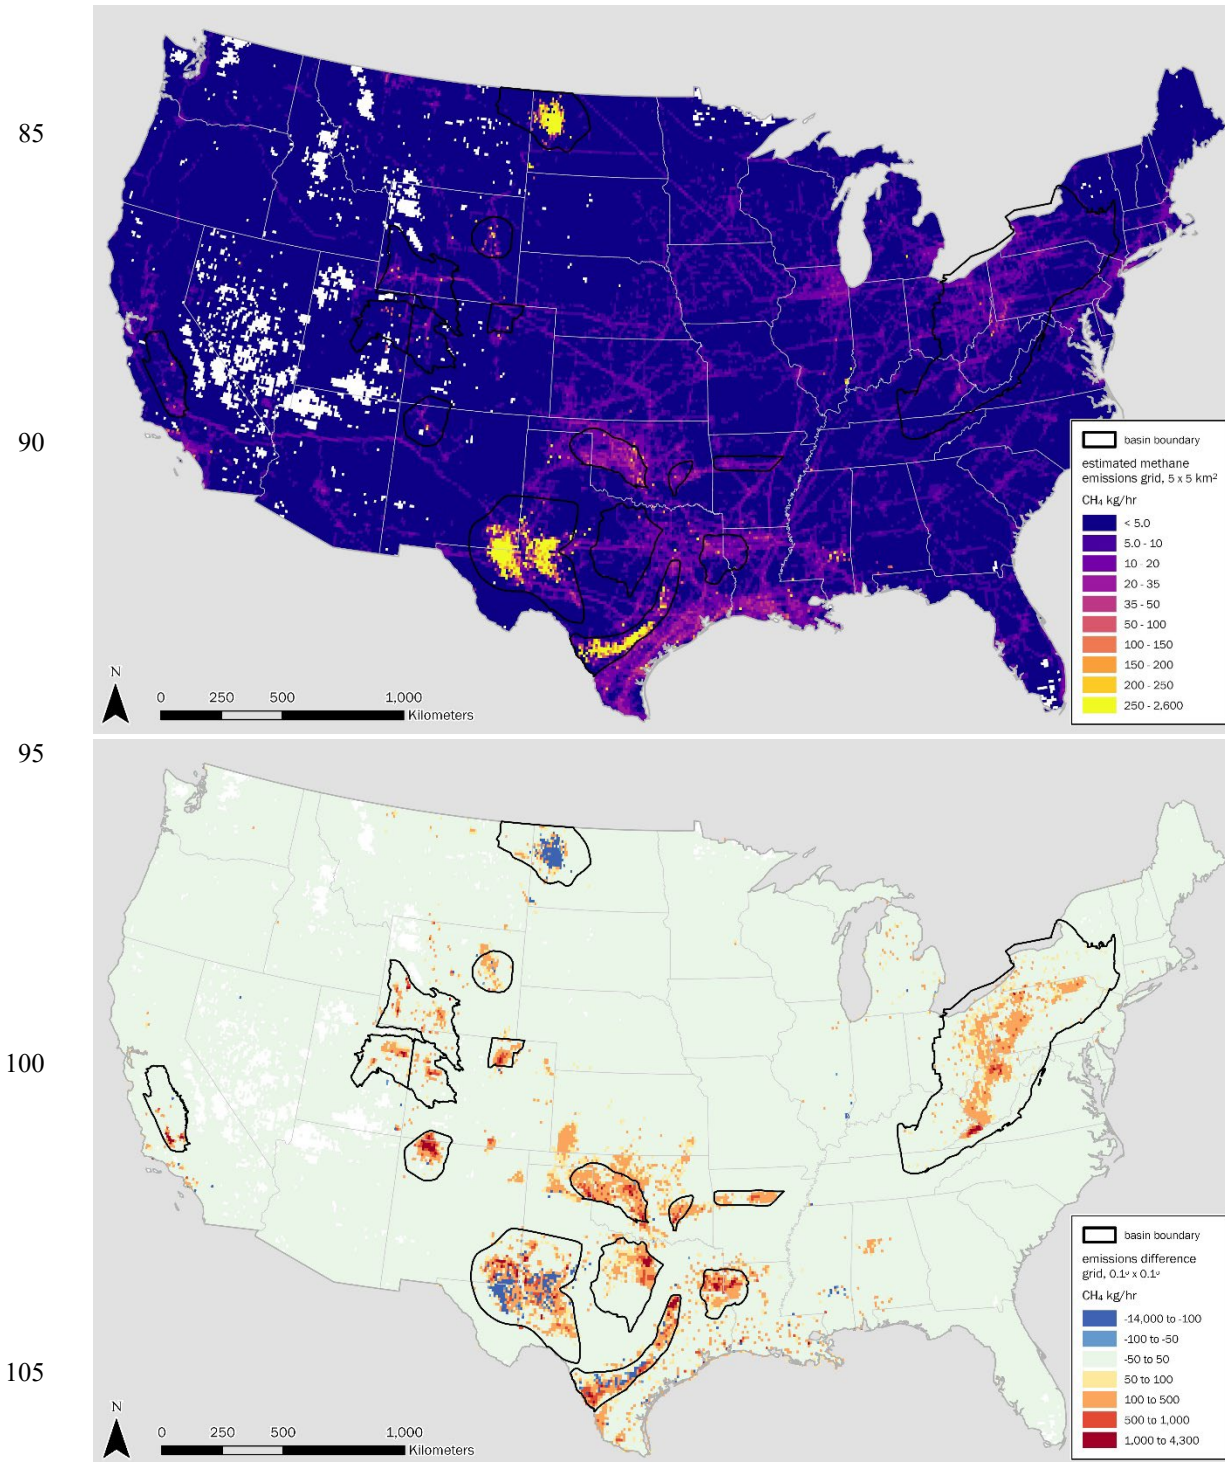

**a.** Estimated spatial distribution of methane emissions in the EDGAR v8 inventory, showing large methane hotspots in the oil-dominant basins of the Permian, Eagle Ford, and the Bakken. **b.** Difference in spatially explicit methane

110 emissions between this study's measurement-based inventory and the EDGAR v8 inventory, showing large differences in all of the major oil and gas basins. Map credit: ESRI, 2023.
